# Supplementary material for: GBA3 promotes fatty acid oxidation and alleviates non-alcoholic fatty liver by increasing CPT2 transcription
Source: publisher site journal article supplement (doi:10.18632/aging.205616), 2024-02-29
Supplement: Supplementary file [file aging-v16i5-205616-supplementary-material-SD1.pdf]

**SUPPLEMENTARY FIGURE**

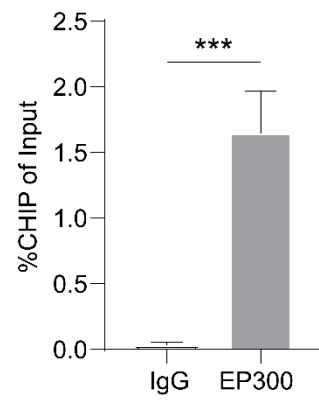

**Supplementary Figure 1. Chromatin immunoprecipitation assay results.**
