# Supplementary material for: GBA3 promotes fatty acid oxidation and alleviates non-alcoholic fatty liver by increasing CPT2 transcription
Source: publisher site journal article supplement (doi:10.18632/aging.205616), 2024-02-29
Supplement: Supplementary file [file aging-v16i5-205616-supplementary-material-SD2.pdf]

## SUPPLEMENTARY TABLES

**Supplementary Table 1. Antibodies used in the study.**

| Gene symbol   | Reactivity | Dilution | Source                    | Catalog     |
|---------------|------------|----------|---------------------------|-------------|
| GBA3          | Human      | 1: 1000  | Abcam                     | ab154897    |
|               | Rat        | 1: 100   | Bioss                     | bs-13298R   |
| MLKL          | Human      | 1: 1000  | Cell Signaling Technology | 37705       |
| p-MLKL (S358) | Human      | 1: 1000  | Cell Signaling Technology | 18640       |
|               | Rat        | 1: 100   | Affinity Biosciences      | AF7420      |
| B-actin       | Human      | 1: 1000  | Cell Signaling Technology | 3700        |
| CPT2          | Human      | 1: 1000  | ABclonal Technology       | A0653       |
| EP300         | Human      | 1: 1000  | Cell Signaling Technology | 86377/54062 |

**Supplementary Table 2. Primers used in the study.**

| Gene symbol | Species |         | Sequence (5'- 3')       |
|-------------|---------|---------|-------------------------|
| BHMT        | Human   | Forward | AGCAGGAGGAGTGAGTCAGA    |
|             |         | Reverse | CTGCCACAGGTTTACCGGAT    |
|             | Rat     | Forward | GGCGAAGTCGTGATCGGAGA    |
|             |         | Reverse | GATGAAGCTGCCGAACTGCC    |
| CYP2C9      | Human   | Forward | TGGATGAAGGTGGCAATTTT    |
|             |         | Reverse | GGGCTTCTCCCACACAAAT     |
|             | Rat     | Forward | TCTGCAATACTTCCCTGCCA    |
|             |         | Reverse | GGCTCTTGATGCTGTTCCA     |
| GBA3        | Human   | Forward | ATGGCTTCCCTGCAGGATT     |
|             |         | Reverse | CTACAGATGTGCTTCAAGGC    |
|             | Rat     | Forward | TCACCGAGAATGGGTTTCCC    |
|             |         | Reverse | CCACGCACAGTAGAGTTGGA    |
| GLYAT       | Human   | Forward | AATGGTGGCAAACCCAAGGC    |
|             |         | Reverse | GCCAGAGTGAATGCAGGGAGA   |
|             | Rat     | Forward | TCCGCCCTCAAGAACAGGAAA   |
|             |         | Reverse | GCCCAGGAACCTCTGACAGT    |
| OTC         | Human   | Forward | TGGCTGATTACCTCACGCTC    |
|             |         | Reverse | TTCTTCTGGCTTTCTGGGCAA   |
|             | Rat     | Forward | TCTTAGCTTGCCAGTGGCCC    |
|             |         | Reverse | GGAAGTGGCTTCCCATAACCGAA |
| TAT         | Human   | Forward | AGCATCCTATGTGTCACCCC    |
|             |         | Reverse | AGCCAACGCCCCATAACAGA    |
|             | Rat     | Forward | CTGCAGTCAGGCCATTGAGC    |
|             |         | Reverse | CCAAGACTTCTCGGGCAGGA    |
| β-Actin     | Human   | Forward | AGAAAATCTGGCACCACACC    |
|             |         | Reverse | CCATCTCTTGCTCGAAGTCC    |
|             | Rat     | Forward | AACCTTCTTGCTGCTCCTCCG   |
|             |         | Reverse | CATACCCACCATCACACCCTGG  |
| LIPE        | Human   | Forward | GTGAGTCCCAGCCAGGTGTG    |
|             |         | Reverse | GTGCACGTCCAGGTTCTGTG    |
| CPT1A       | Human   | Forward | CTTGCCCTGAGACGGGGATT    |
|             |         | Reverse | TCCATGGTCTCCTCCAAGGC    |

|        |       |         |                        |
|--------|-------|---------|------------------------|
| CPT2   | Human | Forward | ACGAGTCCTGTAGCACTGCC   |
|        |       | Reverse | TGCTGAAGCTCACCAGCACT   |
| ACADVL | Human | Forward | AGATTCGGAGATGCAGGCGG   |
|        |       | Reverse | CTGGTCAGAGCGTCAGAGGG   |
| ACADM  | Human | Forward | CAAGGCCGTGACCCGTGTAT   |
|        |       | Reverse | CTGCAGCATCGCCCGAAC     |
| ACADS  | Human | Forward | GGGCGACTCATGGGTTCTGA   |
|        |       | Reverse | GTTTTGCAGGGCTCTGTCCG   |
| ACADL  | Human | Forward | AGCTGATCGTCCTCCCTCCC   |
|        |       | Reverse | GAATGAGAACATCGCGCGGC   |
| ECHS1  | Human | Forward | TTCGCCTCGGGTGCTAACTT   |
|        |       | Reverse | TTGGGGCGGTTCAATTGGAT   |
| ECHDC1 | Human | Forward | GGGAGCGGAAACAAAGGCAC   |
|        |       | Reverse | TTTCGCCATTTTCGTGCAGG   |
| ACAT1  | Human | Forward | CGGAGGCTGGTGCAGGAAAT   |
|        |       | Reverse | ACCAAGCTTAGTGGCTGGCA   |
| IDH1   | Human | Forward | TTCCGGGTGCCTGGAGTTTA   |
|        |       | Reverse | CTACCACAGAACCGCCACTGA  |
| IDH2   | Human | Forward | GCCATAGGCTTCCAGCGACT   |
|        |       | Reverse | ACCATCCATCTCCACCACGG   |
| OGDH   | Human | Forward | GATGGGCAAGACCAAAGCCG   |
|        |       | Reverse | GCCTTGACGATCTGCCTTGC   |
| DLD    | Human | Forward | TGCAGAGCTGGAGTCGTGTG   |
|        |       | Reverse | ATCCTCCAGGACCAGAACCT   |
| SMAD4  | Human | Forward | CCGCTGCGGATCAAAATTGC   |
|        |       | Reverse | GCACAATGCTCAGACAGGCATC |
| EP300  | Human | Forward | AGGGATGAATGCGGGCATGA   |
|        |       | Reverse | GGGAGAGCCCTGCTGAAGAG   |
| TCF12  | Human | Forward | ACTCCCTTGCCTGTGTGGA    |
|        |       | Reverse | GCCCATTCCAGGGACAGGAT   |
| NR2F2  | Human | Forward | CCTGCAGGCTAGTGCCTACTT  |
|        |       | Reverse | ACCGCTTGCATCTTCCTCCT   |
| CBX1   | Human | Forward | TTTGTTCCGGCTGAGGGGAGG  |
|        |       | Reverse | AAAGGGTGACGCTGCTCAGA   |
| STAG1  | Human | Forward | CACCAGATGGCGGGTTAGGA   |
|        |       | Reverse | CCCCAAAAGTCTCCGGTGT    |
| ETV4   | Human | Forward | AAAACAAGTCGGTGCCTGG    |
|        |       | Reverse | TTCATCCTCCGCTCCATCCG   |
| HNF4A  | Human | Forward | CAGAATGAGCGGGACCGGAT   |
|        |       | Reverse | GCTGGCAATCTTCTTCGCC    |

**Supplementary Table 3. Commercial kits used in the study.**

| <b>Name</b>                                            | <b>Source</b> | <b>Catalog</b> |
|--------------------------------------------------------|---------------|----------------|
| Seahorse XF Glycolytic Rate Assay Kit                  | Agilent       | 103344-100     |
| Seahorse XF Palmitate Oxidation Stress Test Kit        |               | 103693-100     |
| Triglyceride Content Enzymatic Assay Kit               | Applygen      | E1013-50       |
| Total Cholesterol Content Enzymatic Assay Kit          |               | E1015-50       |
| Non-esterified Free Fatty Acids Colorimetric Assay Kit | Elabscience   | E-BC-K013-M    |
| Hematoxylin-Eosin Stain Kit                            | Solarbio      | G1120          |
| Modified Oil Red O Stain Kit, Environmentally Friendly |               | G1263          |
| Rat TNF-alpha Quantikine ELISA Kit                     | R&D Systems   | RTA00          |
| Rat IL-1 beta/IL-1F2 Quantikine ELISA Kit              |               | RLB00          |
| Rat IL-10 Quantikine ELISA Kit                         |               | R1000          |
| Alanine aminotransferase Assay Kit                     | Jiancheng     | C009-2-1       |
| Aspartate aminotransferase Assay Kit                   |               | C010-2-1       |
| Lactate dehydrogenase assay kit                        |               | A020-2-2       |
| Cell-Light EdU Apollo488 <i>In Vitro</i> Kit           | RiboBio       | C10310-3       |
| Annexin V-FITC/PI Apoptosis Detection Kit              | Vazyme        | A211           |
| Caspase 8 Activity Assay Ki                            | Beyotime      | C1151          |
| GSH and GSSG Assay Kit                                 |               | S0053          |
| Reactive Oxygen Species Assay Kit                      |               | S0033S         |
| BCA Protein Assay Kit                                  | BestBio       | P0009          |
| Tissue Reactive Oxygen Species Test Kit                |               | BB-470515      |
| Sonication CHIP Kit                                    |               | ABclonal       |
